# Supplementary material
Source: PubMed Central journal article supplement (PMC7114136)
Supplement: ao9b03834_si_001.pdf [file ao9b03834_si_001.pdf]

## Supporting Information

# **PANI@UiO-66 and PANI@UiO-66-NH<sub>2</sub> Polymer-MOF Hybrid Composites as Tunable Semiconducting Materials**

Jordan Shanahan<sup>a</sup> Daniel S. Kissel<sup>a\*</sup> and Eirin Sullivan<sup>b</sup>

<sup>a</sup>Department of Chemistry, Lewis University, One University Pkwy, Romeoville, IL 60455, United States

<sup>b</sup>Department of Chemistry, Illinois State University, S University St, Normal, IL 61761, United States

## **For Table of Contents Only**

1. Energy Dispersive X-ray Spectroscopy of all composite materials and PANI
2. SEM images of x8000 PANI@UiO-66-NH<sub>2</sub> and x5000 PANI
3. PXRD of Pristine UiO-66 and UiO-66-NH<sub>2</sub>
4. UV/Vis Example Tauc plot and band gap table summary
5. Isotherm Plots and BET Surface Areas of UiO-66 and UiO-66-NH<sub>2</sub>

# 1. Energy Dispersive X-ray Spectroscopy of all composite materials and PANI

## 1:1 PANI@UiO-66-NH<sub>2</sub>

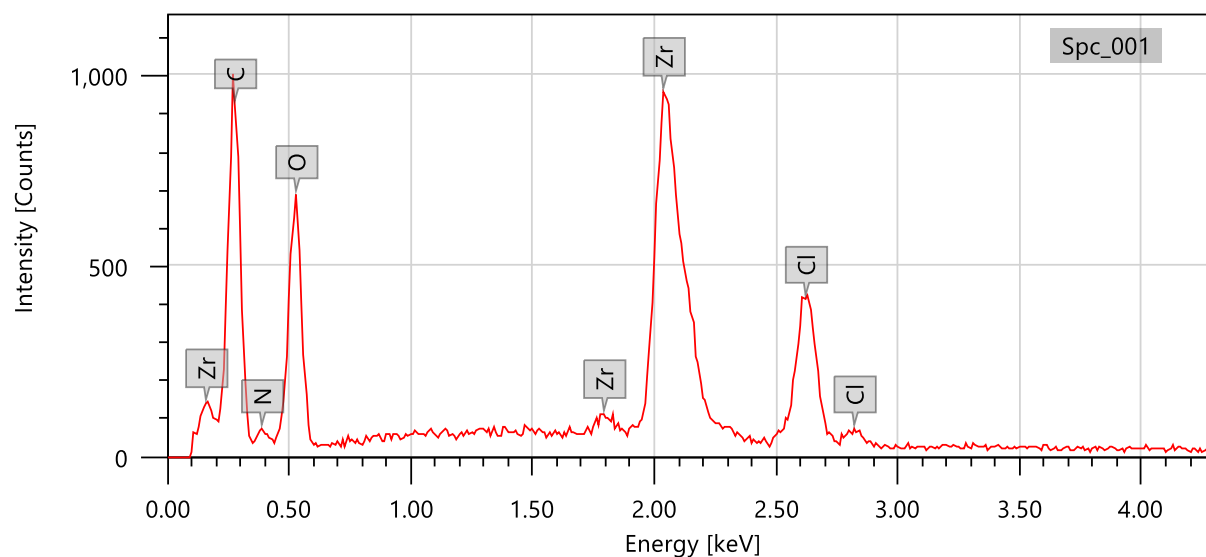

Figure S1: EDS of 1:1 PANI@UiO-66-NH<sub>2</sub> composite

Table S1: Elemental Analysis of 1:1 PANI@UiO-66-NH<sub>2</sub> EDS Spectra

| Element | Line | Mass%                | Atom%      |
|---------|------|----------------------|------------|
| C       | K    | 36.12±0.70           | 58.36±1.13 |
| N       | K    | 4.56±0.64            | 6.32±0.89  |
| O       | K    | 19.67±0.79           | 23.86±0.96 |
| Cl      | K    | 9.04±0.47            | 4.95±0.25  |
| Zr      | L    | 30.60±0.92           | 6.51±0.20  |
| Total   |      | 100.00               | 100.00     |
|         |      | Fitting ratio 0.0551 |            |

1:1 PANI@UiO-66

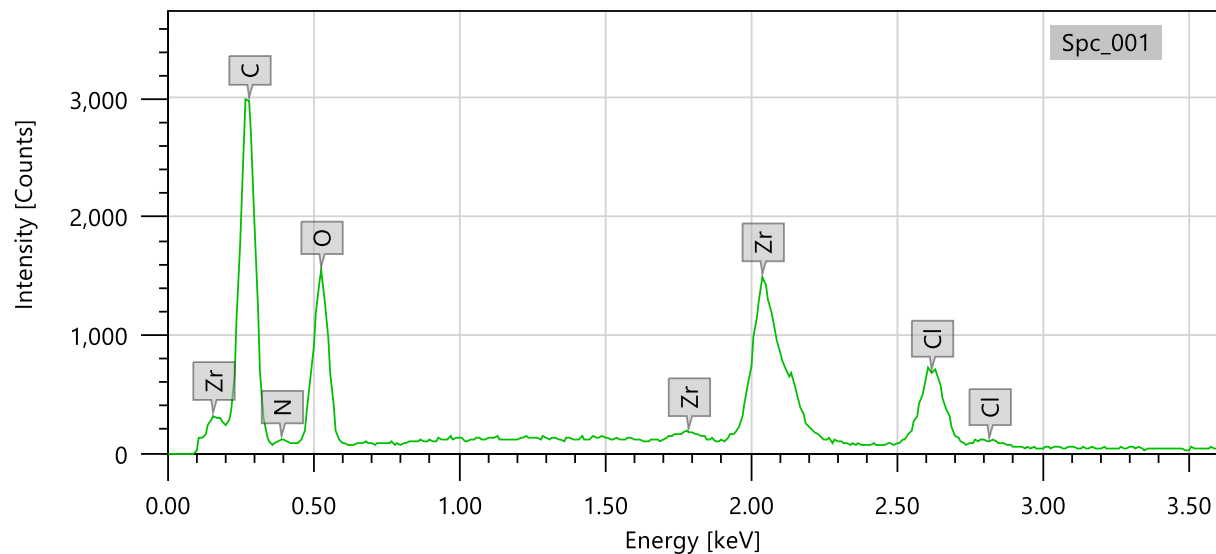

Figure S2: EDS of 1:1 PANI@UiO-66 composite

Table S2: Elemental Analysis of 1:1 PANI@UiO-66 EDS Spectra

| Element | Line | Mass%                | Atom%      |
|---------|------|----------------------|------------|
| C       | K    | 46.27±0.50           | 65.84±0.71 |
| N       | K    | 2.89±0.37            | 3.53±0.45  |
| O       | K    | 21.54±0.57           | 23.01±0.61 |
| Cl      | K    | 7.25±0.29            | 3.50±0.14  |
| Zr      | L    | 22.05±0.55           | 4.13±0.10  |
| Total   |      | 100.00               | 100.00     |
|         |      | Fitting ratio 0.0392 |            |

3:1 PANI@UiO-66-NH<sub>2</sub>

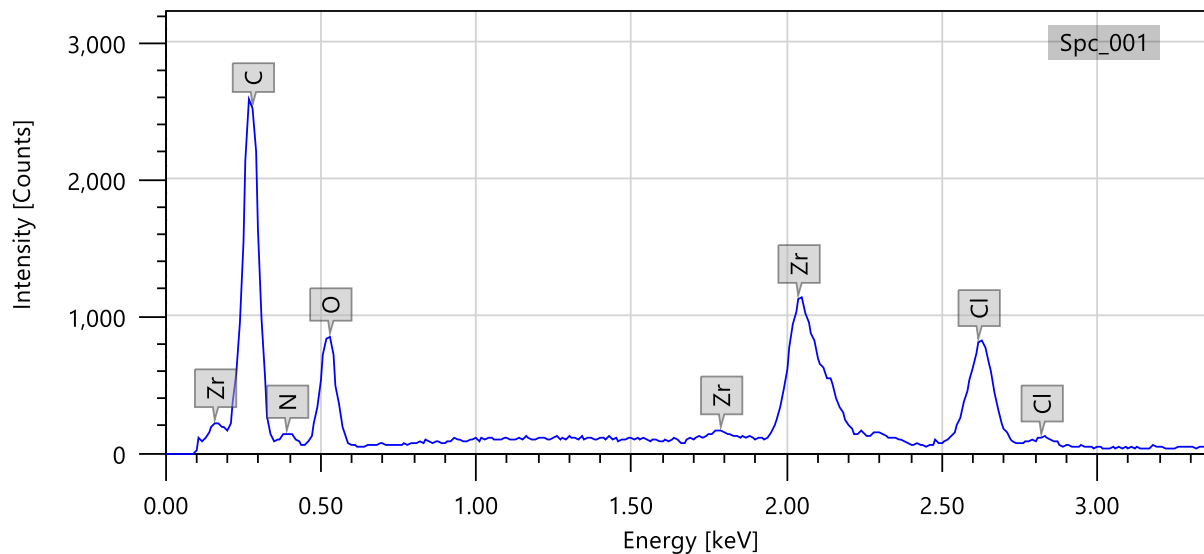

Figure S3: EDS of 3:1 PANI@UiO-66-NH<sub>2</sub> composite

Table S3: Elemental Analysis of 3:1 PANI@UiO-66-NH<sub>2</sub> EDS Spectra

| Element | Line | Mass%                | Atom%      |
|---------|------|----------------------|------------|
| C       | K    | 47.95±0.56           | 67.18±0.79 |
| N       | K    | 6.85±0.61            | 8.23±0.74  |
| O       | K    | 15.52±0.55           | 16.32±0.58 |
| Cl      | K    | 9.61±0.36            | 4.56±0.17  |
| Zr      | L    | 20.07±0.57           | 3.70±0.10  |
| Total   |      | 100.00               | 100.00     |
|         |      | Fitting ratio 0.0357 |            |

3:1 PANI@UiO-66

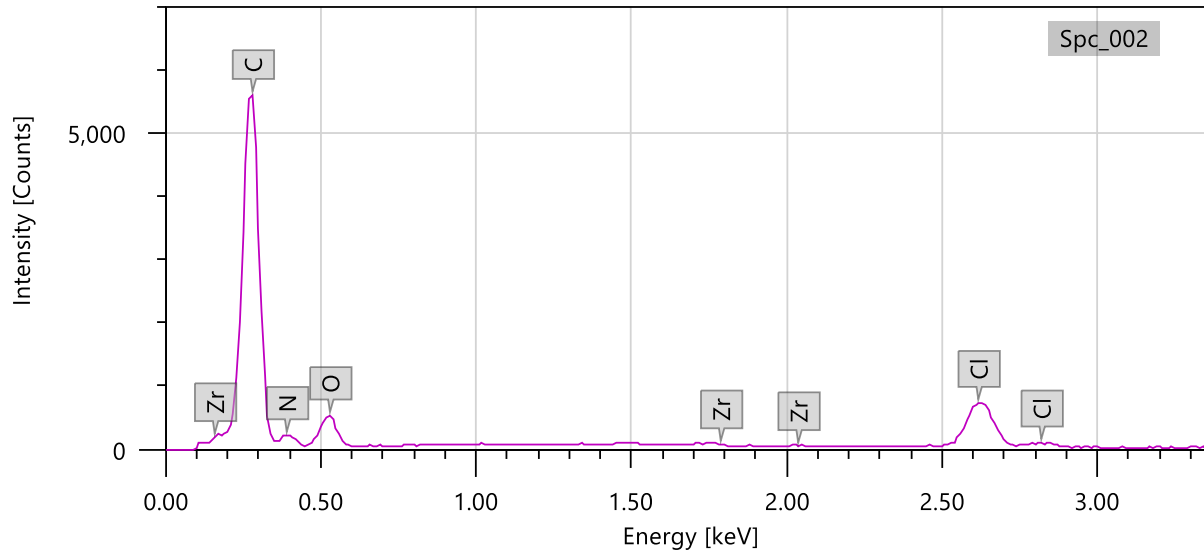

Figure S4: EDS of 3:1 PANI@UiO-66 composite

Table S4: Elemental Analysis of 3:1 PANI@UiO-66 EDS Spectra

| Element | Line | Mass%                | Atom%      |
|---------|------|----------------------|------------|
| C       | K    | 67.16±0.53           | 75.21±0.59 |
| N       | K    | 12.62±0.89           | 12.12±0.85 |
| O       | K    | 10.91±0.50           | 9.17±0.42  |
| Cl      | K    | 9.17±0.34            | 3.48±0.13  |
| Zr      | L    | 0.14±0.08            | 0.02±0.01  |
| Total   |      | 100.00               | 100.00     |
|         |      | Fitting ratio 0.0194 |            |

2:1 PANI@UiO-66-NH<sub>2</sub>

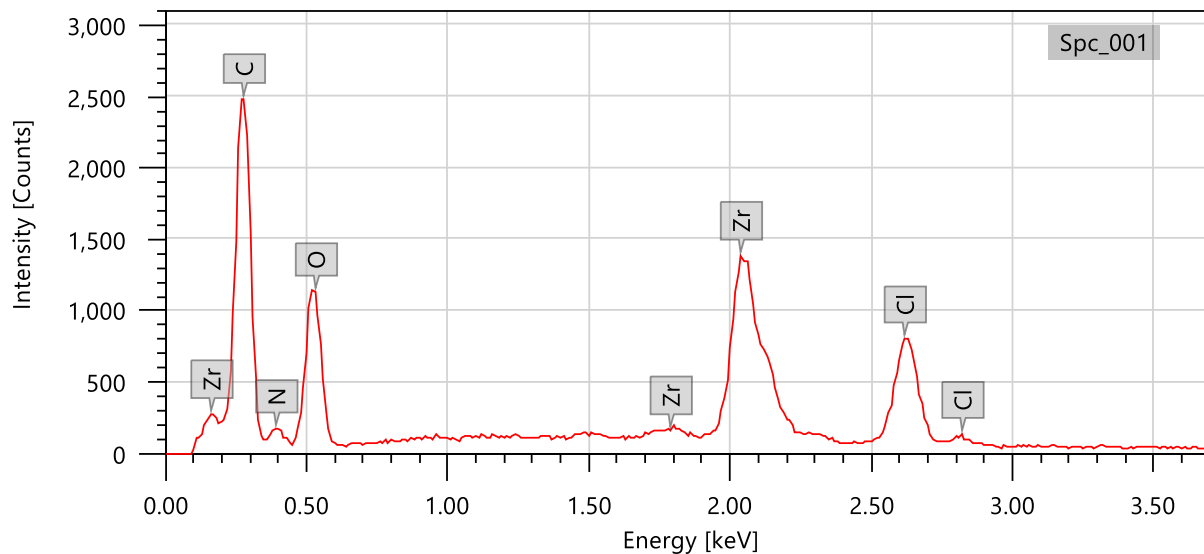

Figure S5: EDS of 2:1 PANI@UiO-66-NH<sub>2</sub> composite

Table S5: Elemental Analysis of 2:1 PANI@UiO-66-NH<sub>2</sub> EDS Spectra

| Element | Line | Mass%                | Atom%      |
|---------|------|----------------------|------------|
| C       | K    | 42.39±0.50           | 61.42±0.73 |
| N       | K    | 7.99±0.60            | 9.92±0.74  |
| O       | K    | 18.52±0.56           | 20.14±0.61 |
| Cl      | K    | 8.59±0.32            | 4.22±0.16  |
| Zr      | L    | 22.51±0.57           | 4.29±0.11  |
| Total   |      | 100.00               | 100.00     |
|         |      | Fitting ratio 0.0378 |            |

2:1 PANI@UiO-66

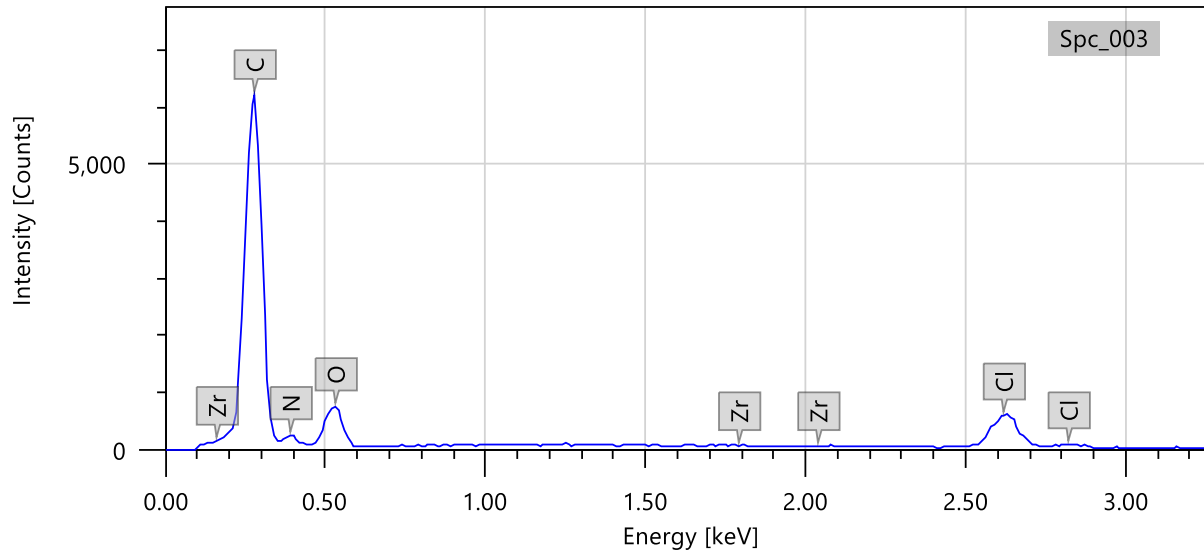

Figure S6: EDS of 2:1 PANI@UiO-66 composite

Table S6: Elemental Analysis of 2:1 PANI@UiO-66 EDS Spectra

| Element | Line | Mass%                | Atom%      |
|---------|------|----------------------|------------|
| C       | K    | 65.21±0.49           | 72.89±0.54 |
| N       | K    | 12.27±0.84           | 11.76±0.80 |
| O       | K    | 14.98±0.56           | 12.57±0.47 |
| Cl      | K    | 7.17±0.30            | 2.72±0.11  |
| Zr      | L    | 0.36±0.09            | 0.05±0.01  |
| Total   |      | 100.00               | 100.00     |
| Spc_003 |      | Fitting ratio 0.0157 |            |



PANI

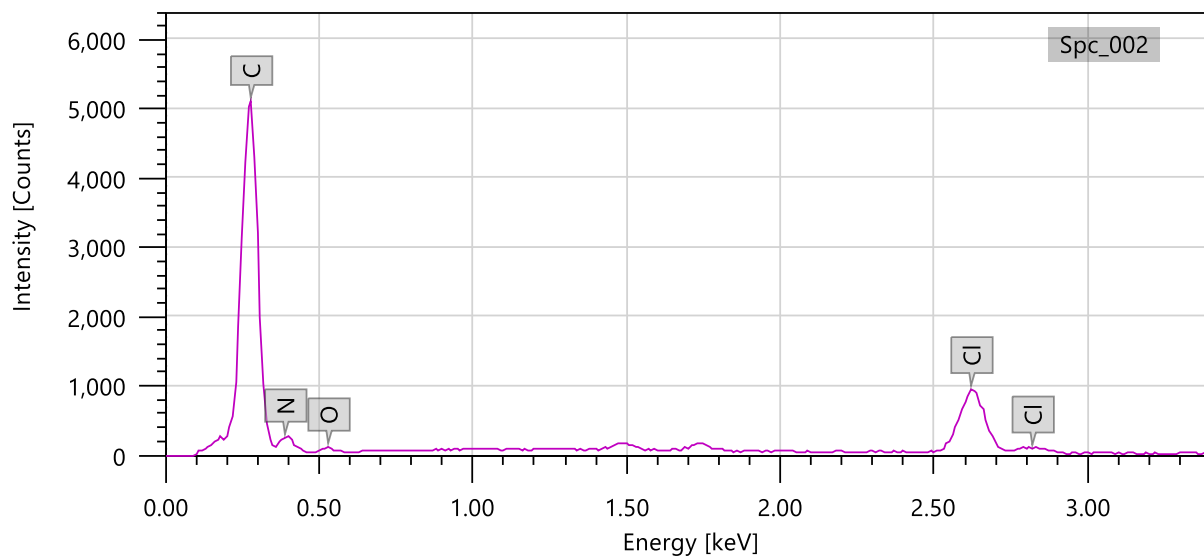

Figure S7: EDS of pure PANI

Table S7: Elemental Analysis of PANI EDS Spectra

| Element | Line | Mass%                | Atom%      |
|---------|------|----------------------|------------|
| C       | K    | 68.87±0.57           | 77.01±0.64 |
| N       | K    | 17.99±1.09           | 17.25±1.04 |
| O       | K    | 1.65±0.21            | 1.38±0.18  |
| Cl      | K    | 11.49±0.39           | 4.35±0.15  |
| Total   |      | 100.00               | 100.00     |
| Spc_002 |      | Fitting ratio 0.0266 |            |

## 2. SEM images of x8000 PANI@UiO-66-NH<sub>2</sub> and x5000 PANI

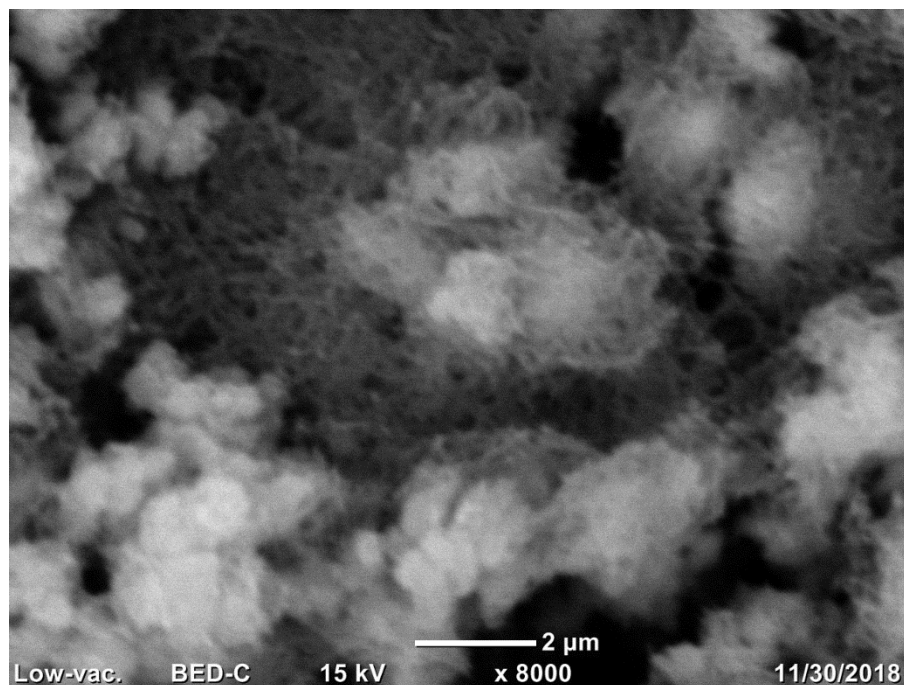

Figure S8: SEM of 3:1 PANI@UiO-66-NH<sub>2</sub> taken at x8000 magnification coated with 5 nm Au nanoparticles.

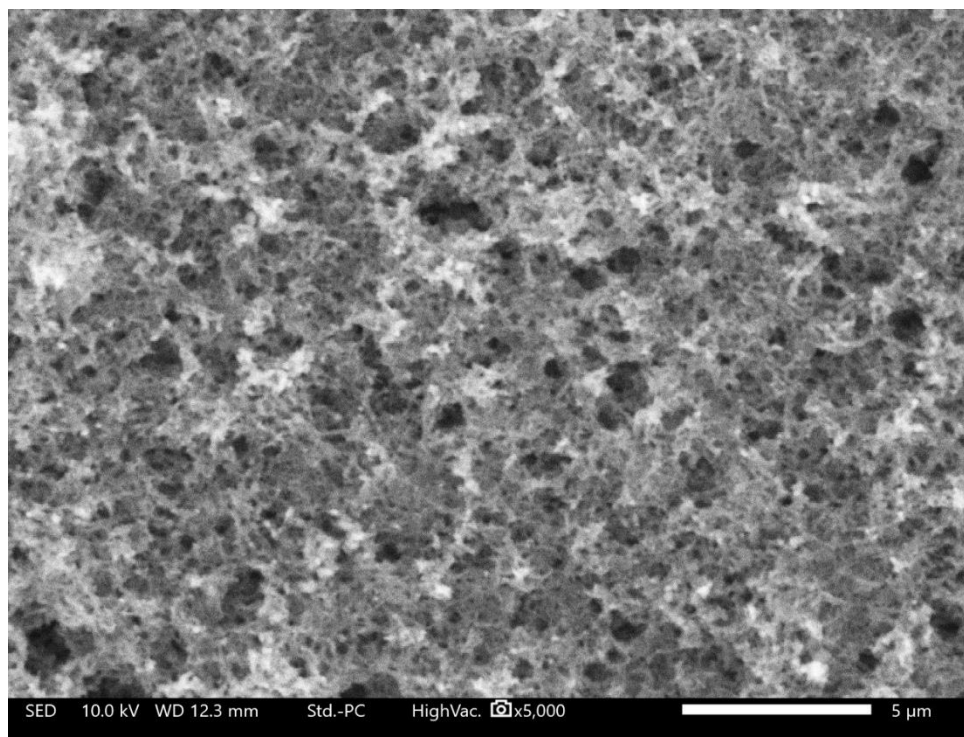

Figure S9: SEM of PANI taken at x5000 magnification at x5000 magnification

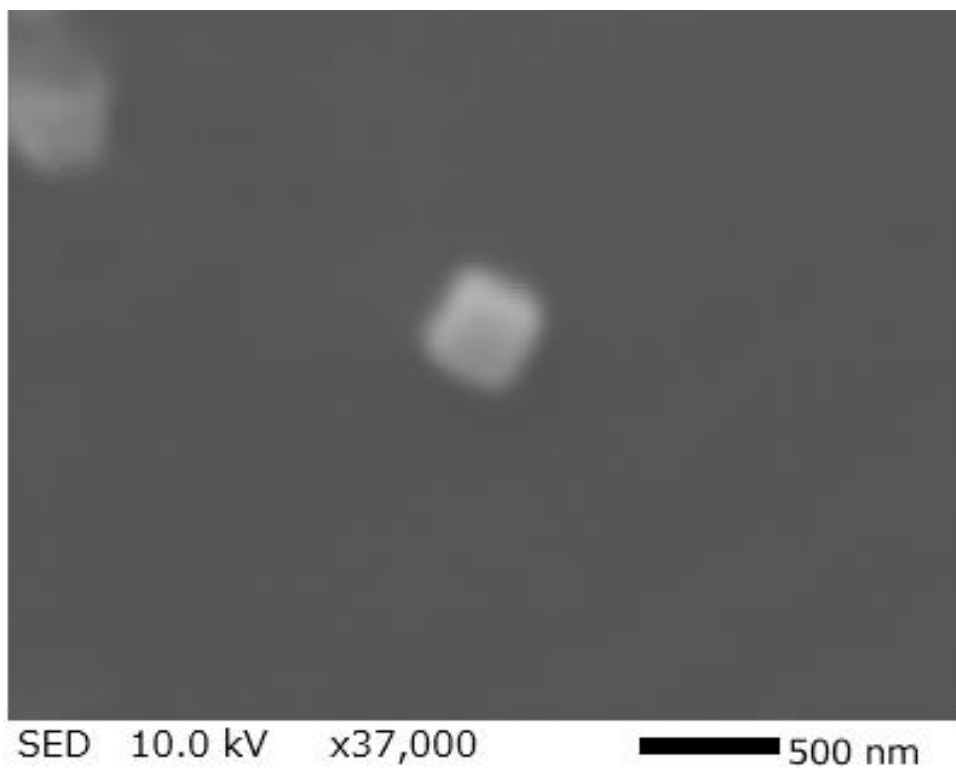

Figure S10: SEM of UiO-66 single crystal showing octahedral topology

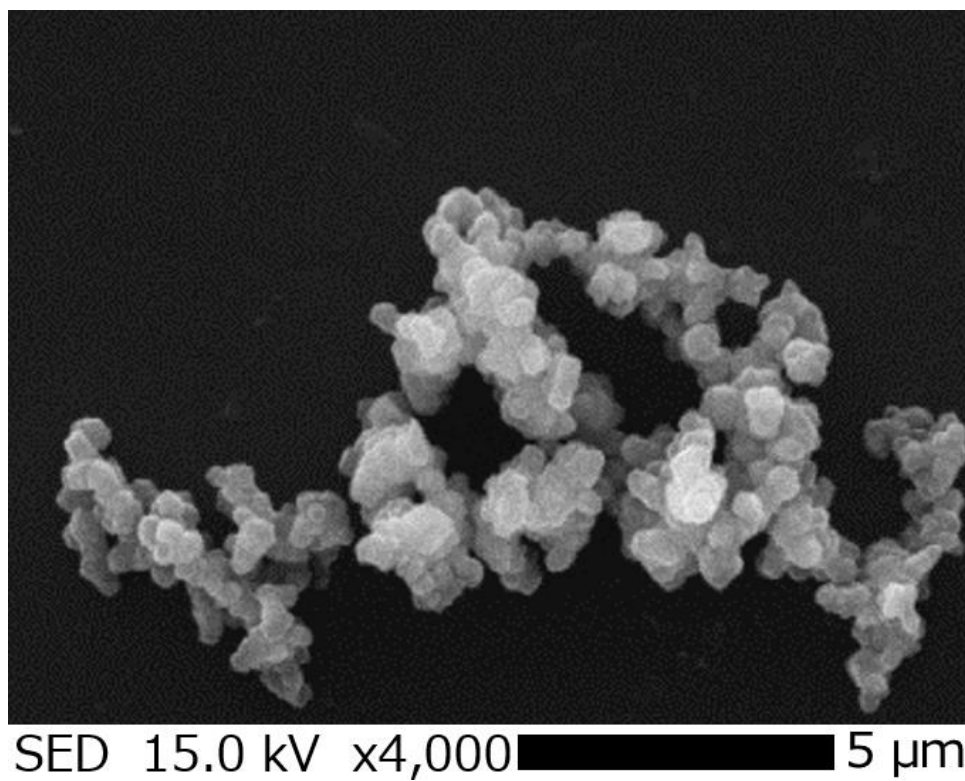

Figure S11: SEM of UiO-66 aggregate cluster

### 3. PXRD of Pristine UiO-66 and UiO-66-NH<sub>2</sub>

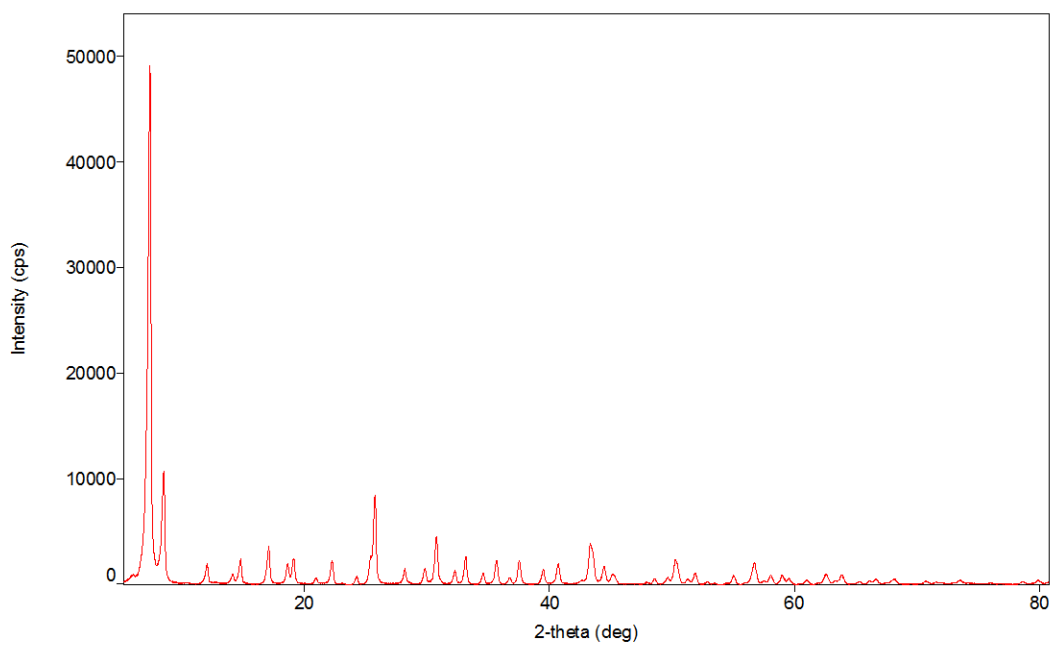

Figure S12: PXRD of UiO-66 consistent with pattern reported by Cavka et al.<sup>14</sup>

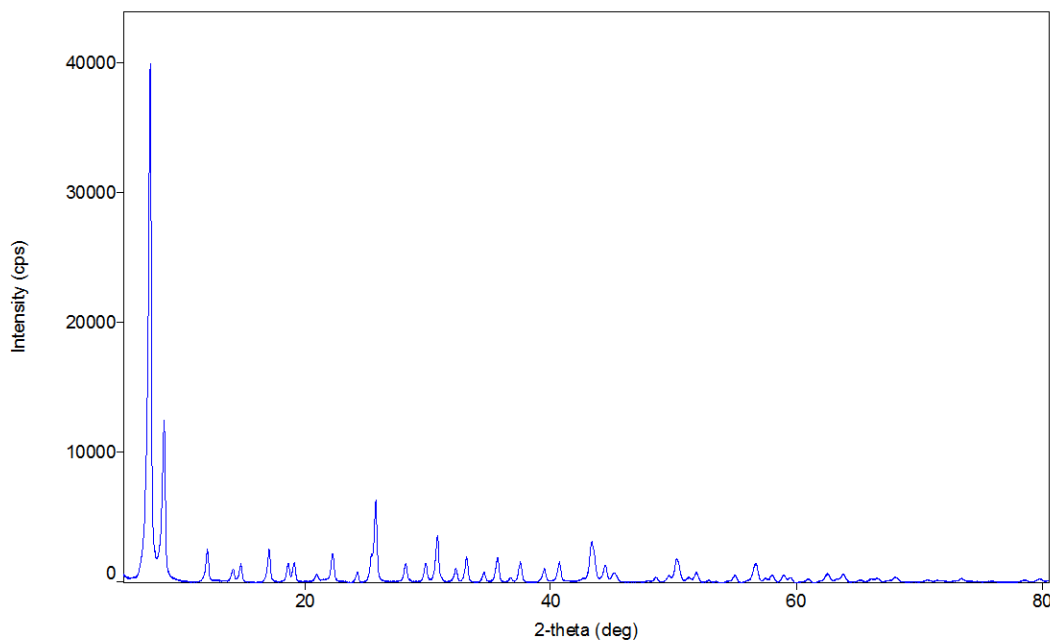

Figure S13: PXRD of UiO-66-NH<sub>2</sub> consistent with pattern reported by Cavka et al.<sup>14</sup>

#### 4. UV/Vis Example Tauc plot and band gap table summary

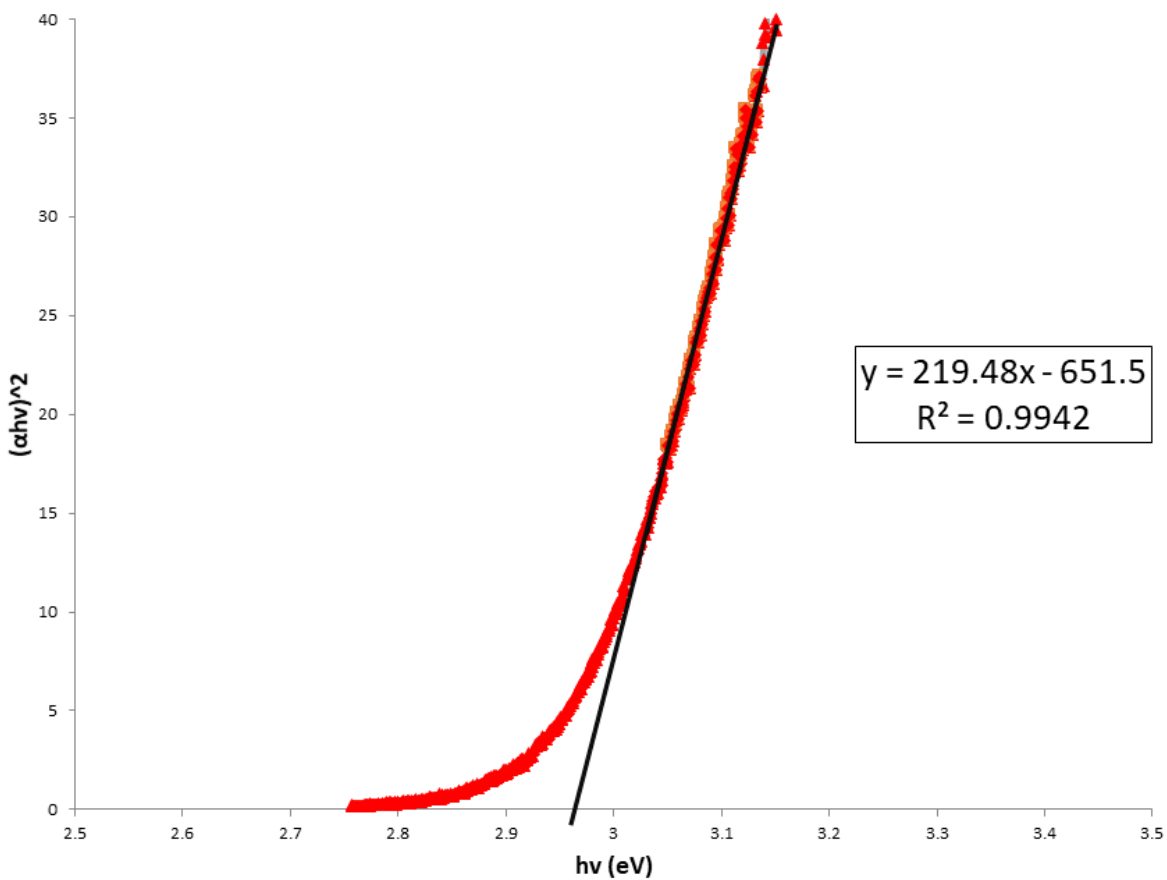

Figure S14: Example Tauc Plot of direct band gap measurements done for UiO-66, UiO-66-NH<sub>2</sub> (shown above), and PANI.

Table S8: Band Gaps Measured of All Pure Materials

| Material               | Band gap (ev) |
|------------------------|---------------|
| UiO-66                 | 4.04          |
| UiO-66-NH <sub>2</sub> | 2.95          |
| PANI                   | 3.54          |

## 5. Isotherm Plots and BET Surface Areas of UiO-66 and UiO-66-NH<sub>2</sub>

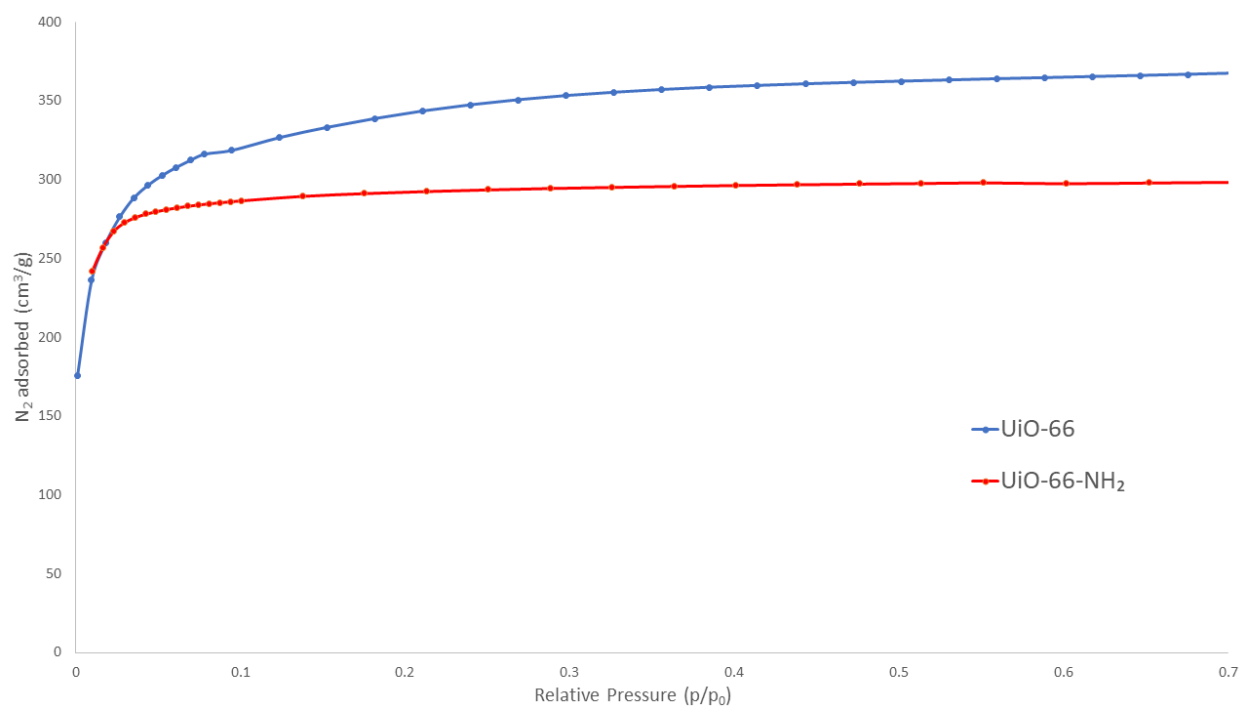

Figure S15: N<sub>2</sub> isotherms of UiO-66 and UiO-66-NH<sub>2</sub>

Table S9: BET Surface Areas of Pure Materials

| Material               | BET Surface Area (m <sup>2</sup> /g) |
|------------------------|--------------------------------------|
| UIO-66                 | 1261                                 |
| UIO-66-NH <sub>2</sub> | 1203                                 |

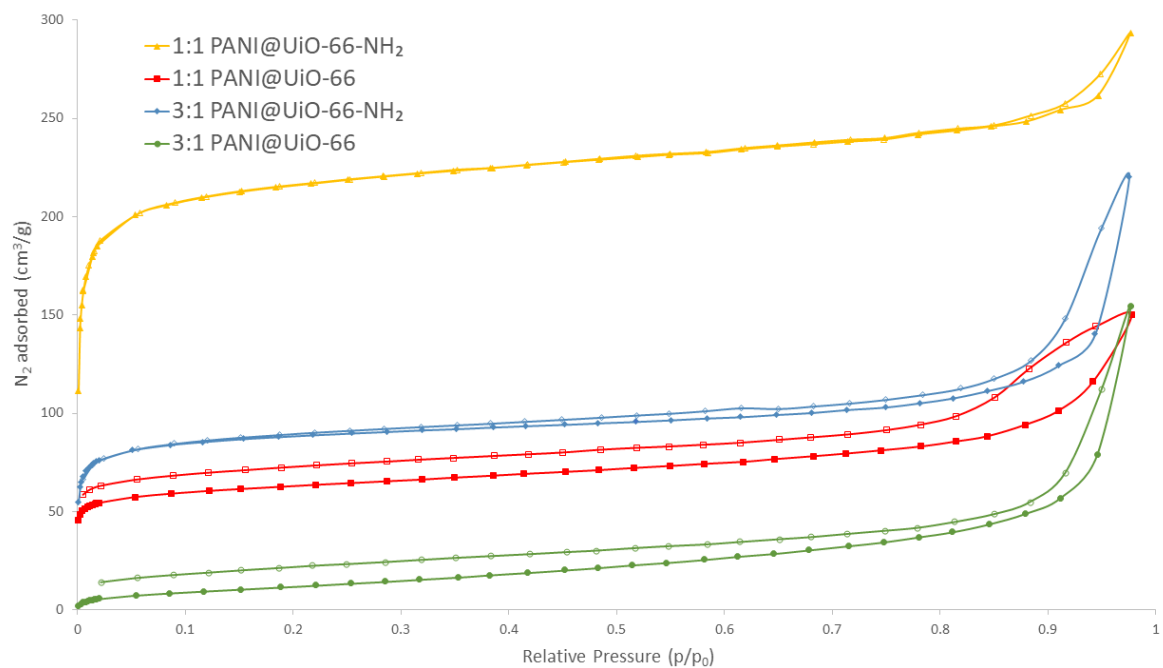

Figure S16: N<sub>2</sub> isotherms of PANI@UiO-66 and PANI@UiO-66-NH<sub>2</sub> composites.
